# Supplementary material for: Comparative Study between Exogenously Applied Plant Growth Hormones versus Metabolites of Microbial Endophytes as Plant Growth-Promoting for Phaseolus vulgaris L.
Source: MDPI journal article supplement (doi:10.3390/cells10051059), 2021-04-29
Supplement: s1 [file s1]

# Comparative Study between Exogenously Applied Plant Growth Hormones versus Metabolites of Microbial Endophytes as Plant Growth-Promoting for *Phaseolus vulgaris* L.

Mohamed A. Ismail <sup>1</sup>, Mohamed A. Amin <sup>1</sup>, Ahmed M. Eid <sup>1</sup>, Saad El-Din Hassan <sup>1,\*</sup>, Hany A. M. Mahgoub <sup>1</sup>, Islam Lashin <sup>1, 2</sup>, Abdelrhman T. Abdelwahab <sup>1, 3</sup>, Ehab Azab <sup>4</sup>, Adil A. Gobouri <sup>5</sup>, Amr Elkelish <sup>6,7</sup>, and Amr Fouda <sup>1,\*</sup>

## Supplementary materials:

**Table S1:** Extracellular enzymatic activities of bacterial and fungal endophytic strains isolated from roots of common bean plants.

| Endophytic isolates | Ammonia production | P solubilization<br>Diameter of a clear zone (mm) | Enzyme production (diameter of clear zones (mm)) |                         |                          |                         |                         |
|---------------------|--------------------|---------------------------------------------------|--------------------------------------------------|-------------------------|--------------------------|-------------------------|-------------------------|
|                     |                    |                                                   | Amylase                                          | Cellulase               | Protease                 | Pectinase               | Xylanase                |
| PB1                 | -                  | 0 <sup>g</sup>                                    | 17.6 ± 0.3 <sup>d</sup>                          | 13.3 ± 0.3 <sup>g</sup> | 17.3 ± 0.3 <sup>g</sup>  | 0 <sup>i</sup>          | 12.6 ± 0.3 <sup>g</sup> |
| PB2                 | +                  | 7.6 ± 0.23 <sup>d</sup>                           | 17.6 ± 0.3 <sup>d</sup>                          | 21.3 ± 0.6 <sup>d</sup> | 26 ± 0.57 <sup>e</sup>   | 12.6 ± 0.8 <sup>h</sup> | 14.3 ± 0.3 <sup>f</sup> |
| PB3                 | -                  | 0 <sup>g</sup>                                    | 13.6 ± 0.3 <sup>f</sup>                          | 15.6 ± 0.8 <sup>f</sup> | 0 <sup>h</sup>           | 24 ± 1.5 <sup>e</sup>   | 21.3 ± 0.8 <sup>d</sup> |
| PB4                 | ++                 | 0 <sup>g</sup>                                    | 0 <sup>h</sup>                                   | 18.3 ± 0.8 <sup>e</sup> | 24 ± 0.57 <sup>f</sup>   | 14.3 ± 0.3 <sup>g</sup> | 8.6 ± 0.8 <sup>h</sup>  |
| PB5                 | ++                 | 8.9 ± 0.26 <sup>c</sup>                           | 15 ± 0.57 <sup>e</sup>                           | 21.3 ± 0.8 <sup>d</sup> | 28.6 ± 0.88 <sup>d</sup> | 11.6 ± 0.6 <sup>h</sup> | 15.3 ± 0.3 <sup>e</sup> |
| PB6                 | -                  | 5.2 ± 0.17 <sup>f</sup>                           | 12 ± 0.57 <sup>g</sup>                           | 18.3 ± 0.3 <sup>e</sup> | 0 <sup>h</sup>           | 15.6 ± 0.6 <sup>f</sup> | 14 ± 0.6 <sup>f</sup>   |
| FP1                 | ++                 | 0 <sup>g</sup>                                    | 33 ± 1.15 <sup>b</sup>                           | 40 ± 1.15 <sup>a</sup>  | 22.6 ± 0.88 <sup>f</sup> | 35.3 ± 1.2 <sup>c</sup> | 24 ± 1 <sup>c</sup>     |
| FB2                 | ++                 | 11 ± 0.32 <sup>a</sup>                            | 37 ± 1.7 <sup>a</sup>                            | 42 ± 1 <sup>a</sup>     | 38.3 ± 1.2 <sup>a</sup>  | 42.3 ± 1.3 <sup>a</sup> | 31.3 ± 0.8 <sup>a</sup> |
| FB3                 | ++                 | 9.9 ± 0.43 <sup>b</sup>                           | 30 ± 1.1 <sup>c</sup>                            | 36.6 ± 1.7 <sup>b</sup> | 34.3 ± 1.7 <sup>b</sup>  | 38.6 ± 1.4 <sup>b</sup> | 27.3 ± 0.8 <sup>b</sup> |
| FB4                 | -                  | 6.5 ± 0.28 <sup>e</sup>                           | 28.3 ± 1.2 <sup>c</sup>                          | 27.3 ± 1.4 <sup>c</sup> | 30.6 ± 1.2 <sup>c</sup>  | 33 ± 1 <sup>d</sup>     | 0 <sup>i</sup>          |

Values within the same column with different letters are significantly different ( $p \leq 0.05$ ), values are means ± SE (n = 3). + and ++ meaning the low and high ammonia production respectively based on color change. PB1 is *E. asburiae*; PB2 is *B. thuringiensis*; PB3 is *A. radioresistens*; PB4 is *B. brevis*; PB5 is *B. agri*; PB6 is *B. subtilis*; PF1 is *P. crustosum*; PF2 is *A. sorghi*; PF3 is *P. commune*; PF4 is *A. flavus*.

**Table S2:** Effect of foliar spraying of exogenously applied hormones and microbial endophyte metabolites on the fresh and dry weight of shoot and root of common bean plants.

| Treatments                   |     | Shoot FW (g)          |                        | Shoot DW (g)          |                       | Root FW (g)             |                        | Root DW (g)              |                          |
|------------------------------|-----|-----------------------|------------------------|-----------------------|-----------------------|-------------------------|------------------------|--------------------------|--------------------------|
|                              |     | 1st                   | 2nd                    | 1st                   | 2nd                   | 1st                     | 2nd                    | 1st                      | 2nd                      |
|                              |     | stage                 | stage                  | stage                 | stage                 | stage                   | stage                  | stage                    | stage                    |
| Control                      |     | 2.4±0.1 <sup>b</sup>  | 5.04±0.1 <sup>c</sup>  | 0.27±0.0 <sup>d</sup> | 0.6±0.06 <sup>c</sup> | 0.4±0.02 <sup>b</sup>   | 0.5±0.02 <sup>b</sup>  | 0.05±0.002 <sup>b</sup>  | 0.08±0.002 <sup>b</sup>  |
| Exogenously Applied Hormones | IAA | 2.5±0.2 <sup>cb</sup> | 7.7±0.9 <sup>b</sup>   | 0.4±0.0 <sup>b</sup>  | 0.8±0.04 <sup>c</sup> | 0.5±0.005 <sup>a</sup>  | 0.61±0.02 <sup>a</sup> | 0.07±0.001 <sup>a</sup>  | 0.09±0.001 <sup>b</sup>  |
|                              | BA  | 3.3±0.2 <sup>ba</sup> | 7.6±0.9 <sup>b</sup>   | 0.3±0.01 <sup>c</sup> | 1.01±0.1 <sup>b</sup> | 0.52±0.007 <sup>a</sup> | 0.07±0.05 <sup>a</sup> | 0.08±0.002 <sup>a</sup>  | 0.09±0.005 <sup>ab</sup> |
| Bacterial Endophytes         | PB2 | 3.3±0.2 <sup>ba</sup> | 12.5±1.02 <sup>a</sup> | 0.5±0.01 <sup>b</sup> | 1.4±0.02 <sup>a</sup> | 0.5±0.01 <sup>ab</sup>  | 0.07±0.1 <sup>a</sup>  | 0.08±0.004 <sup>a</sup>  | 0.1±0.01 <sup>a</sup>    |
|                              | PB5 | 4.9±0.3 <sup>a</sup>  | 11.8±0.7 <sup>a</sup>  | 0.6±0.02 <sup>a</sup> | 1.3±0.01 <sup>a</sup> | 0.59±0.02 <sup>ab</sup> | 0.08±0.04 <sup>a</sup> | 0.07±0.001 <sup>a</sup>  | 0.13±0.01 <sup>a</sup>   |
|                              | BM  | 3.8±0.4 <sup>a</sup>  | 9.3±0.7 <sup>ab</sup>  | 0.5±0.01 <sup>b</sup> | 1.4±0.03 <sup>a</sup> | 0.5±0.012 <sup>ab</sup> | 0.7±0.05 <sup>a</sup>  | 0.05±0.001 <sup>b</sup>  | 0.14±0.005 <sup>a</sup>  |
| Fungal Endophytes            | PF2 | 3.8±0.3 <sup>a</sup>  | 12.2±0.8 <sup>a</sup>  | 0.5±0.02 <sup>b</sup> | 1.5±0.05 <sup>a</sup> | 0.5±0.006 <sup>ab</sup> | 0.74±0.05 <sup>a</sup> | 0.04±0.001 <sup>b</sup>  | 0.1±0.001 <sup>a</sup>   |
|                              | PF3 | 3.9±0.2 <sup>a</sup>  | 10.3±0.4 <sup>ab</sup> | 0.5±0.01 <sup>b</sup> | 1.1±0.05 <sup>b</sup> | 0.5±0.01 <sup>ab</sup>  | 0.5±0.01 <sup>b</sup>  | 0.07±0.002 <sup>ab</sup> | 0.1±0.001 <sup>ab</sup>  |
|                              | FM  | 3.5±0.2 <sup>a</sup>  | 10.7±0.3 <sup>ab</sup> | 0.5±0.01 <sup>b</sup> | 1.1±0.05 <sup>b</sup> | 0.5±0.02 <sup>ab</sup>  | 0.5±0.01 <sup>b</sup>  | 0.1±0.001 <sup>a</sup>   | 0.09±0.002 <sup>ab</sup> |

Different letters between columns denote that mean values are significantly different ( $p \leq 0.05$ ) by Tukey's test. IAA is Indole-3-acetic acid; BA is Benzyl adenin; PB2 is *B. thuringiensis*; PB5 is *B. agri*; BM is bacterial mix; PF2 is *A. sorghi*; PF3 is *P. commune*; FM is fungal mix.

**Table S3:** Effect of foliar spraying of exogenously applied hormones and microbial endophyte metabolites on chlorophyll and carotene content of common bean plants.

| Treatments                   |     | Chlorophyll a<br>(mg/g FW) |                         | Chlorophyll b<br>(mg/g FW) |                          | Total Chlorophyll<br>(mg/g FW) |                          | Total Carotene<br>(mg/g FW) |                        |
|------------------------------|-----|----------------------------|-------------------------|----------------------------|--------------------------|--------------------------------|--------------------------|-----------------------------|------------------------|
|                              |     | 1st                        | 2nd                     | 1st                        | 2nd                      | 1st                            | 2nd                      | 1st                         | 2nd                    |
|                              |     | stage                      | stage                   | stage                      | stage                    | stage                          | stage                    | stage                       | stage                  |
| Control                      |     | 6.86±0.17 <sup>b</sup>     | 5.56±0.13 <sup>b</sup>  | 7.78±0.17 <sup>ab</sup>    | 16.25±0.17 <sup>b</sup>  | 14.6±0.14 <sup>b</sup>         | 21.81±0.10 <sup>b</sup>  | 1.79±0.25 <sup>a</sup>      | 0.92±0.09 <sup>a</sup> |
| Exogenously Applied Hormones | IAA | 6.77±0.03 <sup>b</sup>     | 5.65±0.04 <sup>b</sup>  | 8.10±0.32 <sup>ab</sup>    | 20.28±0.19 <sup>a</sup>  | 14.8±0.35 <sup>b</sup>         | 25.92±0.15 <sup>ab</sup> | 1.73±0.12 <sup>a</sup>      | 0.62±0.07 <sup>b</sup> |
|                              | BA  | 7.69±0.05 <sup>a</sup>     | 6.55±0.50 <sup>a</sup>  | 7.46±0.16 <sup>b</sup>     | 17.21±1.76 <sup>ab</sup> | 15.1±0.20 <sup>ab</sup>        | 23.76±1.26 <sup>b</sup>  | 1.77±0.19 <sup>a</sup>      | 1.31±0.15 <sup>a</sup> |
| Bacterial Endophytes         | PB2 | 6.78±0.25 <sup>b</sup>     | 5.41±0.13 <sup>b</sup>  | 9.36±0.61 <sup>ab</sup>    | 19.05±0.60 <sup>ab</sup> | 16.1±0.37 <sup>a</sup>         | 24.46±0.62 <sup>ab</sup> | 1.14±0.18 <sup>a</sup>      | 1.11±0.15 <sup>a</sup> |
|                              | PB5 | 6.78±0.1 <sup>b</sup>      | 5.86±0.14 <sup>ab</sup> | 9.04±0.49 <sup>ab</sup>    | 20.50±0.40 <sup>a</sup>  | 15.8±0.38 <sup>ab</sup>        | 26.36±0.30 <sup>a</sup>  | 1.29±0.35 <sup>a</sup>      | 0.64±0.08 <sup>b</sup> |
|                              | BM  | 6.79±0.1 <sup>b</sup>      | 5.96±0.11 <sup>ab</sup> | 8.82±0.28 <sup>ab</sup>    | 20.30±0.03 <sup>a</sup>  | 15.6±0.21 <sup>ab</sup>        | 26.26±0.11 <sup>a</sup>  | 1.48±0.16 <sup>a</sup>      | 0.77±0.02 <sup>b</sup> |
| Fungal Endophytes            | PF2 | 6.79±0.1 <sup>b</sup>      | 5.90±0.14 <sup>ab</sup> | 8.82±0.28 <sup>ab</sup>    | 18.52±2.08 <sup>ab</sup> | 15.6±0.21 <sup>ab</sup>        | 24.41±1.95 <sup>ab</sup> | 1.48±0.16 <sup>a</sup>      | 1.60±0.07 <sup>a</sup> |
|                              | PF3 | 6.87±0.05 <sup>b</sup>     | 6.12±0.08 <sup>a</sup>  | 9.54±0.37 <sup>a</sup>     | 20.00±0.93 <sup>a</sup>  | 16.4±0.34 <sup>a</sup>         | 26.12±0.86 <sup>a</sup>  | 1.34±0.22 <sup>a</sup>      | 1.53±0.03 <sup>a</sup> |
|                              | FM  | 6.92±0.01 <sup>b</sup>     | 6.20±0.03 <sup>a</sup>  | 8.98±0.16 <sup>ab</sup>    | 19.97±0.90 <sup>ab</sup> | 15.9±0.18 <sup>ab</sup>        | 26.17±0.89 <sup>a</sup>  | 1.45±0.06 <sup>a</sup>      | 1.45±0.18 <sup>a</sup> |

Values within the same column with different letters are significantly different ( $p \leq 0.05$ ), values are means  $\pm$  SE ( $n = 3$ ). IAA is Indole-3-acetic acid; BA is Benzyl adenin; PB2 is *B. thuringiensis*; PB5 is *B. agri*; BM is bacterial mix; PF2 is *A. sorghi*; PF3 is *P. commune*; FM is fungal mix.

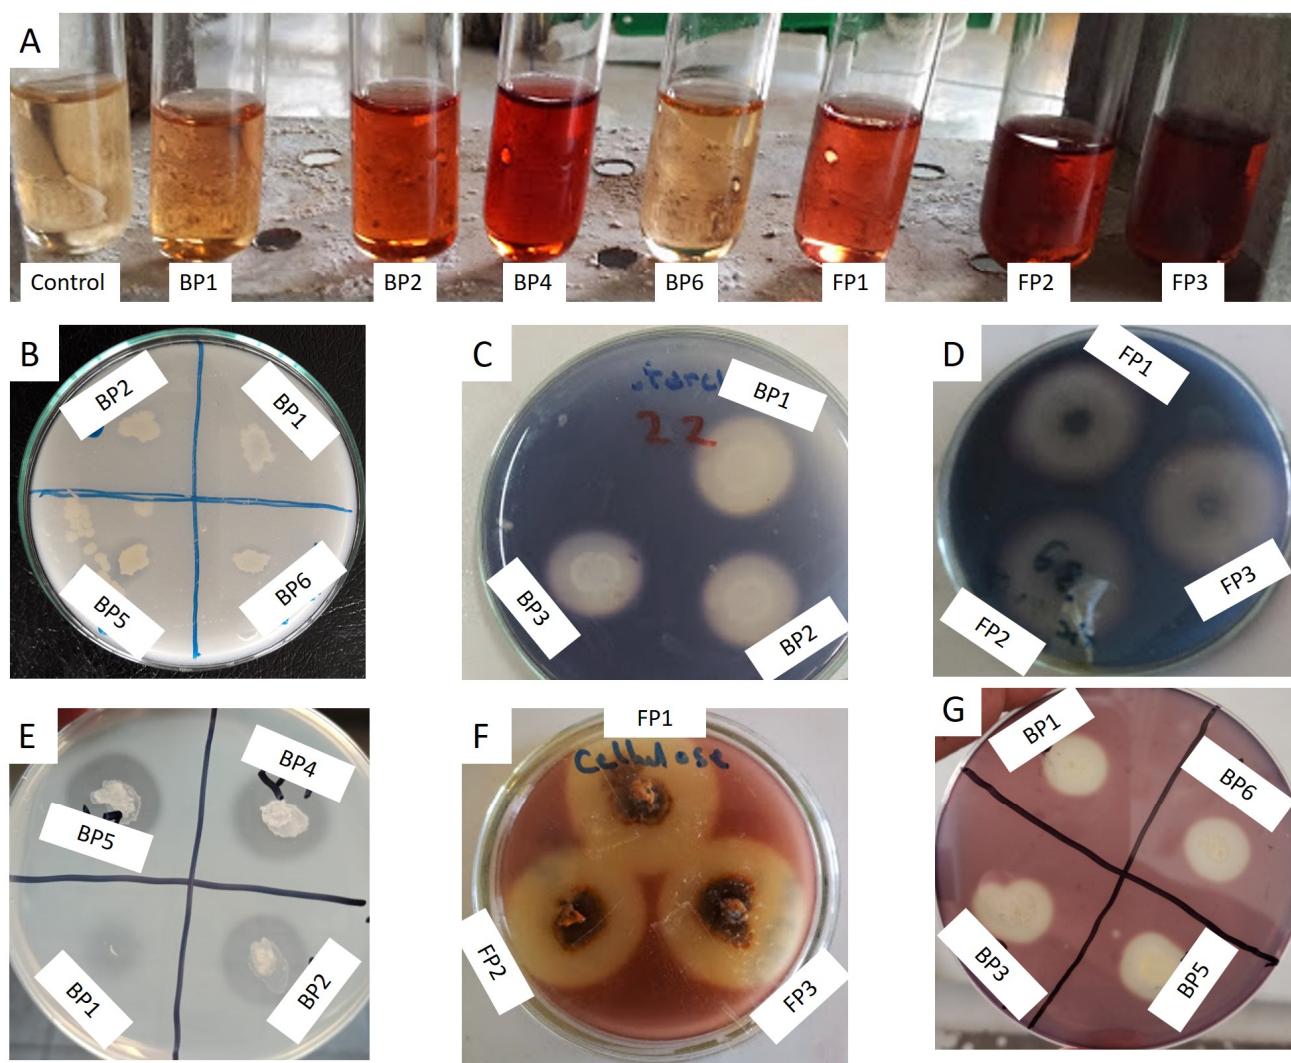

**Figure S1.** Example of plant growth-promoting activities of some endophytic bacteria and fungi. (A) ammonia production; (B) phosphate solubilization; (C and D) amylase activity for some bacterial and fungal strains; (E) Protease activity for some bacterial strain; (F) cellulase activity for some fungal strains; (G) Xylanase activity for some bacterial strains. PB1 is *E. asburiae*; PB2 is *B. thuringiensis*; PB3 is *A. radioresistens*; PB4 is *B. brevis*; PB5 is *B. agri*; PB6 is *B. subtilis*; PF1 is *P. crustosum*; PF2 is *A. sorghi*; PF3 is *P. commune*; PF4 is *A. flavus*.

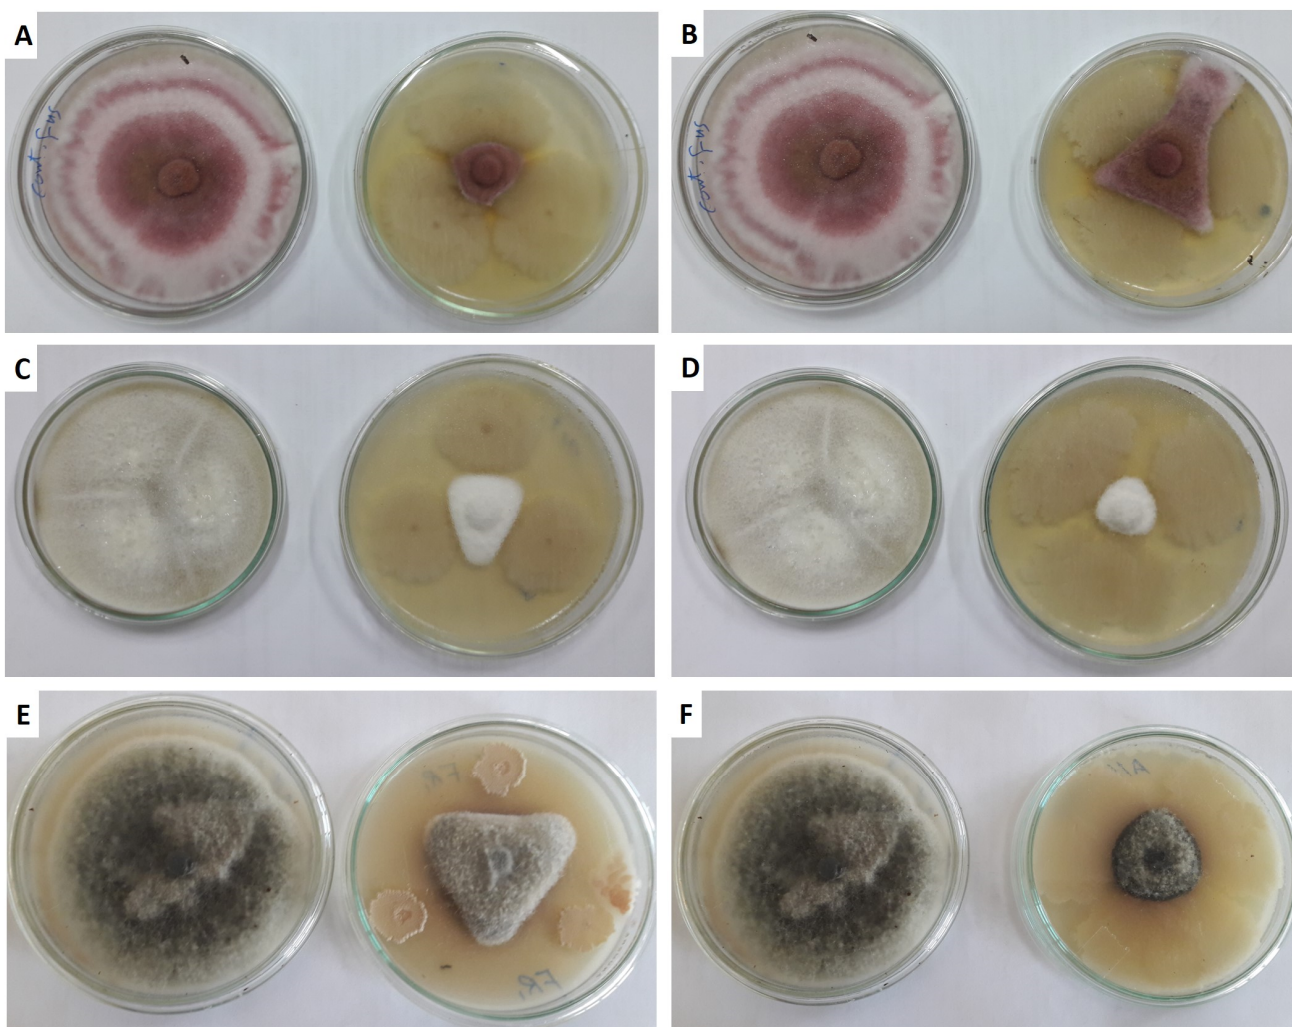

**Figure S2.** In vitro antagonistic activity of some endophytic bacterial species obtained in the current study against *Fusarium oxysporum* (A), *Pythium ultimum* (B), and *Alternaria alternata* (C) as plant pathogenic fungi. The selected endophytic bacterial species denotes as (A) *Brevibacillus agri* PB5; (B) *Bacillus thuringiensis* PB2; (C) *Brevibacillus brevis* PB4; (D) *Brevibacillus agri* PB5; (E) *Acinetobacter radioresistens* PB3; (F) *Brevibacillus agri* PB5.



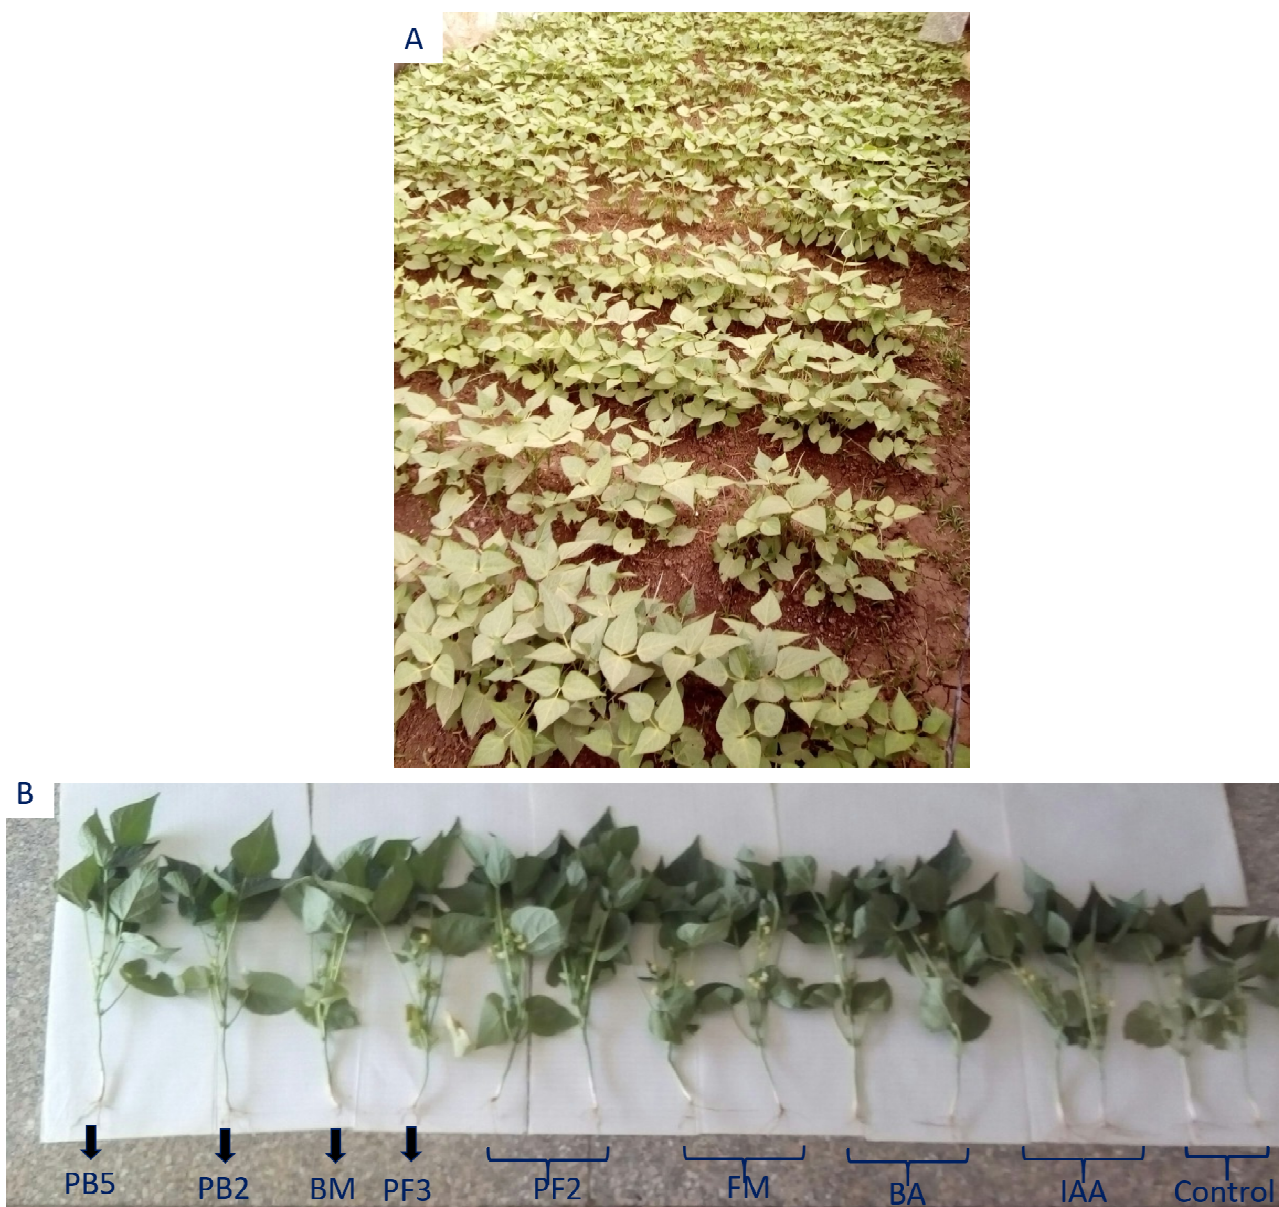

**Figure S3.** (A) photo of greenhouse experiemnt; (B) photo showed gradually shoot and root length for different treatment. IAA is Indole-3-acetic acid; BA is Benzyl adenin; PB2 is *B. thuringiensis*; PB5 is *B. agri*; BM is bacterial mix; PF2 is *A. sorghi*; PF3 is *P. commune*; FM is fungal mix.
